# Supplementary material
Source: MDPI journal article supplement (https://www.mdpi.com/2073-4395/12/9/2224)
Supplement: s1 [file s1]

# Ioannidou et al. Supplementary material

**Table S1.** Characteristics and attributes of the selected mixed orchards (location, system, main tree species, area, and tree age).

| a/a | Location name        | Code   | System<br>(Org=B or Con=C) | Main tree crop | Area (ha) | Tree age (years) |
|-----|----------------------|--------|----------------------------|----------------|-----------|------------------|
| 1   | A. Varvara           | ALB1   | B                          | Almonds        | 0.8       | 15               |
| 2   | Lythrodontas         | PLB2   | B                          | Plums          | 0.542     | 13               |
| 3   | Lythrodontas         | PISC3  | C                          | Pistachios     | 0.284     | 22               |
| 4   | Korakou              | PLB4   | B                          | Plums          | 0.45      | 5                |
| 5   | Korakou              | APRC5  | C                          | Appricots      | 0.17      | 10               |
| 6   | Temvria              | PLB6   | B                          | Plums          | 0.38      | 10               |
| 7   | Galata- Temvria      | PLC7   | C                          | Plums          | 0.44      | 20               |
| 8   | Vavla                | NUB10  | B                          | Nuts           | 1.03      | 18               |
| 9   | Louvaras             | CHB11  | B                          | Cherry         | 0.39      | 10               |
| 10  | Limnatis             | PLB13  | B                          | Plums          | 0.23      | 6                |
| 11  | Limnatis             | ALB14  | B                          | Almonds        | 0.51      | 25               |
| 12  | Limnatis             | ALC15  | C                          | Almonds        | 0.84      | 25               |
| 13  | Limnatis             | ALC16  | C                          | Almonds        | 1.33      | 40               |
| 14  | Vavla                | ALC17  | C                          | Almonds        | 0.76      | 25               |
| 15  | Peristerona          | PLB18  | B                          | Plums          | 0.488     | 12               |
| 16  | Peristerona          | PLC19  | C                          | Plums          | 0.33      | 10               |
| 17  | Koutrafas            | PLB20  | B                          | Plums          | 0.641     | 10               |
| 18  | Koutrafas            | APRC21 | C                          | Appricots      | 0.652     | 20               |
| 19  | A. Ioannis Maloundas | APRB22 | B                          | Appricots      | 0.95      | 7                |
| 20  | A. Ioannis Maloundas | NUC23  | C                          | Nuts           | 0.3       | 20               |
| 21  | Dymes                | PLB26  | B                          | Plums          | 0.384     | 20               |
| 22  | Dymes                | ALC27  | C                          | Almonds        | 0.107     | 20               |
| 23  | Athiainou            | ALB30  | B                          | Almonds        | 1.41      | 4                |
| 24  | Athiainou            | ALC31  | C                          | Almonds        | 0.46      | 10               |
| 25  | Athiainou            | ALB32  | B                          | Almonds        | 0.8       | 13               |
| 26  | Athiainou            | ALC33  | C                          | Almonds        | 1.67      | 15               |
| 27  | Lythrodontas         | PEB34  | B                          | Peach          | 0.35      | 8                |
| 28  | Lythrodontas         | NUC35  | C                          | Nuts           | 0.48      | 20               |
| 29  | Mosfiloti            | PEC37  | C                          | Peach          | 0.5       | 10               |
| 30  | Trouloi              | NUB38  | B                          | Nuts Almonds   | 0.443     | 15               |
| 31  | M. Machaira          | PEB40  | B                          | Appricots      | 0.84      | 5                |
| 32  | Machairas            | NUC41  | C                          | Nuts           | 0.578     | 20               |
| 33  | Kapedes              | CHB42  | B                          | Cherry         | 0.98      | 7                |
| 34  | Kapedes              | NUC43  | C                          | Nuts           | 0.312     | 15               |
| 35  | Kampia               | PEC44  | C                          | Peach          | 0.39      | 10               |
| 36  | Mesa Chorio          | PEB46  | B                          | Peach          | 0.71      | 6                |
| 37  | Amargeti             | PLB48  | B                          | Plums          | 0.409     | 7                |
| 38  | Amargeti             | NUC49  | C                          | Nuts           | 0.62      | 15               |
| 39  | Panagia              | PLC53  | C                          | Plums          | 0.364     | 4                |

Table S2. Soil parameters.

|                     | Soil respiration (CO <sub>2</sub> mg/100g /24h/25°C) | Org N (%) | MWD (mm) | Org matter (%) | Number of weed species | AMF(%) |
|---------------------|------------------------------------------------------|-----------|----------|----------------|------------------------|--------|
| <b>Stone fruits</b> |                                                      |           |          |                |                        |        |
| PLB2                | 54                                                   | 0.135     | 14       | 0.94           | 9                      | 32     |
| PLB4                | 29                                                   | 0.198     | 11       | 1.36           | 6                      | 22     |
| APRC5               | 19                                                   | 0.111     | 8        | 0.87           | 5                      | 12     |
| PLB6                | 36                                                   | 0.156     | 13       | 1.12           | 7                      | 32     |
| PLC7                | 20                                                   | 0.121     | 12       | 0.89           | 5                      | 12     |
| CHB11               | 38                                                   | 0.165     | 13       | 1.32           | 8                      | 32     |
| PLB13               | 36                                                   | 0.165     | 12       | 1.21           | 8                      | 32     |
| PLB18               | 39                                                   | 0.145     | 12       | 1.11           | 10                     | 41     |
| PLC19               | 25                                                   | 0.124     | 9        | 0.95           | 4                      | 24     |
| PLB20               | 45                                                   | 0.135     | 12       | 0.99           | 9                      | 29     |
| APRC21              | 25                                                   | 0.148     | 10       | 1.11           | 3                      | 27     |
| APRB22              | 41                                                   | 0.178     | 13       | 1.32           | 5                      | 28     |
| PLB26               | 29                                                   | 0.165     | 13       | 1.22           | 10                     | 36     |
| PEB34               | 29                                                   | 0.168     | 14       | 1.23           | 5                      | 31     |
| PEC37               | 17                                                   | 0.123     | 10       | 0.87           | 1                      | 16     |
| PEB40               | 37                                                   | 0.165     | 13       | 1.19           | 7                      | 33     |
| CHB42               | 32                                                   | 0.145     | 11       | 1.21           | 6                      | 29     |
| PEC44               | 17                                                   | 0.094     | 10       | 0.68           | 4                      | 26     |
| PEB46               | 34                                                   | 0.142     | 12       | 1.1            | 5                      | 43     |
| PLB48               | 32                                                   | 0.132     | 13       | 0.95           | 5                      | 32     |
| PLC53               | 19                                                   | 0.109     | 9        | 0.86           | 1                      | 11     |
| <b>Nuts</b>         |                                                      |           |          |                |                        |        |
| ALB1                | 38                                                   | 0.185     | 12       | 1.31           | 6                      | 37     |
| PISC3               | 18                                                   | 0.108     | 9        | 0.82           | 4                      | 14     |
| NUB10               | 33                                                   | 0.145     | 12       | 1.03           | 7                      | 19     |
| ALB14               | 29                                                   | 0.124     | 12       | 0.92           | 5                      | 28     |
| ALC15               | 17                                                   | 0.119     | 7        | 0.87           | 2                      | 20     |
| ALC16               | 18                                                   | 0.125     | 8        | 0.92           | 3                      | 17     |
| ALC17               | 22                                                   | 0.131     | 8        | 0.99           | 3                      | 23     |
| NUC23               | 22                                                   | 0.132     | 10       | 0.99           | 3                      | 24     |
| ALC27               | 23                                                   | 0.101     | 10       | 1.17           | 6                      | 17     |
| ALB30               | 56                                                   | 0.135     | 13       | 0.99           | 7                      | 25     |
| ALC31               | 23                                                   | 0.121     | 9        | 0.84           | 4                      | 12     |
| ALB32               | 29                                                   | 0.156     | 12       | 1.15           | 5                      | 23     |
| ALC33               | 19                                                   | 0.112     | 7        | 0.87           | 3                      | 18     |
| NUC35               | 19                                                   | 0.121     | 9        | 0.87           | 3                      | 19     |
| NUB38               | 36                                                   | 0.174     | 12       | 1.35           | 4                      | 28     |
| NUC41               | 24                                                   | 0.132     | 9        | 0.98           | 3                      | 19     |
| NUC43               | 17                                                   | 0.098     | 7        | 0.75           | 3                      | 24     |
| NUC49               | 24                                                   | 0.108     | 12       | 0.82           | 2                      | 21     |

**Table S3.** Emission factors for diesel and fertilizer production.

| Input                       | GHG emissions                           | Source         |
|-----------------------------|-----------------------------------------|----------------|
| Diesel burned in machinery  | 3.8 kg CO <sub>2</sub> -eq/L            | Ecoinvent v3.8 |
| Manure (sheep & goat)       | 0.147 kg CO <sub>2</sub> -eq/kg product | Ecoinvent v3.8 |
| Organic fertilizer (5-5-10) | 0.675 kg CO <sub>2</sub> -eq/kg product | Ecoinvent v3.8 |
| Mineral N fertilizer        | 1.568 kg CO <sub>2</sub> -eq/kg N       | Ecoinvent v3.8 |

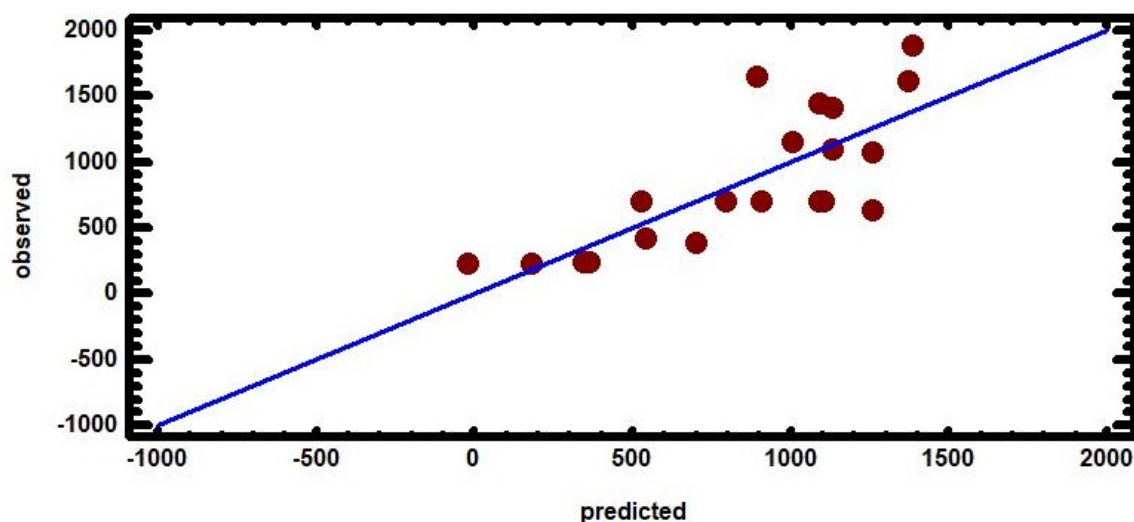

**Figure S1.** Plot of observed vs. predicted GHG emissions for the case of organic and conventional mixed stone fruit orchards.

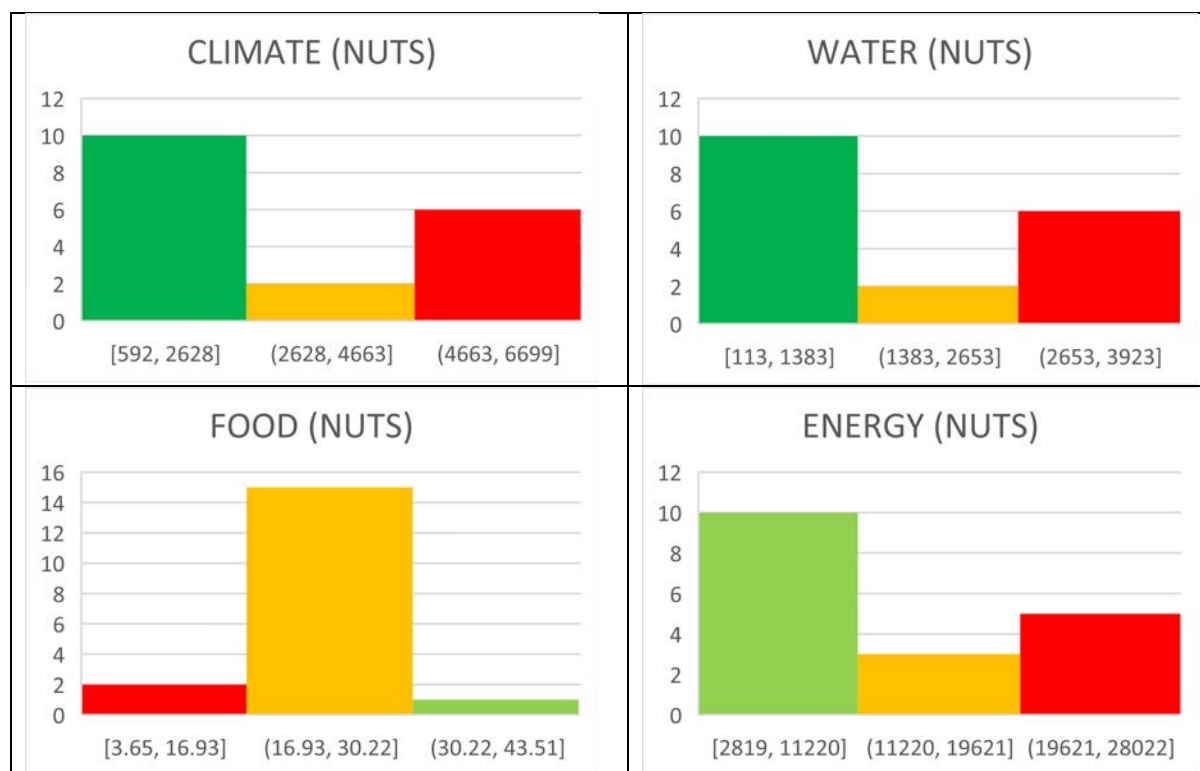

**Figure S2.** Classes obtained based on the values of the WEFC parameters for the mixed nut orchards. Green: 3 points; orange: 1 point; red: 0 points.

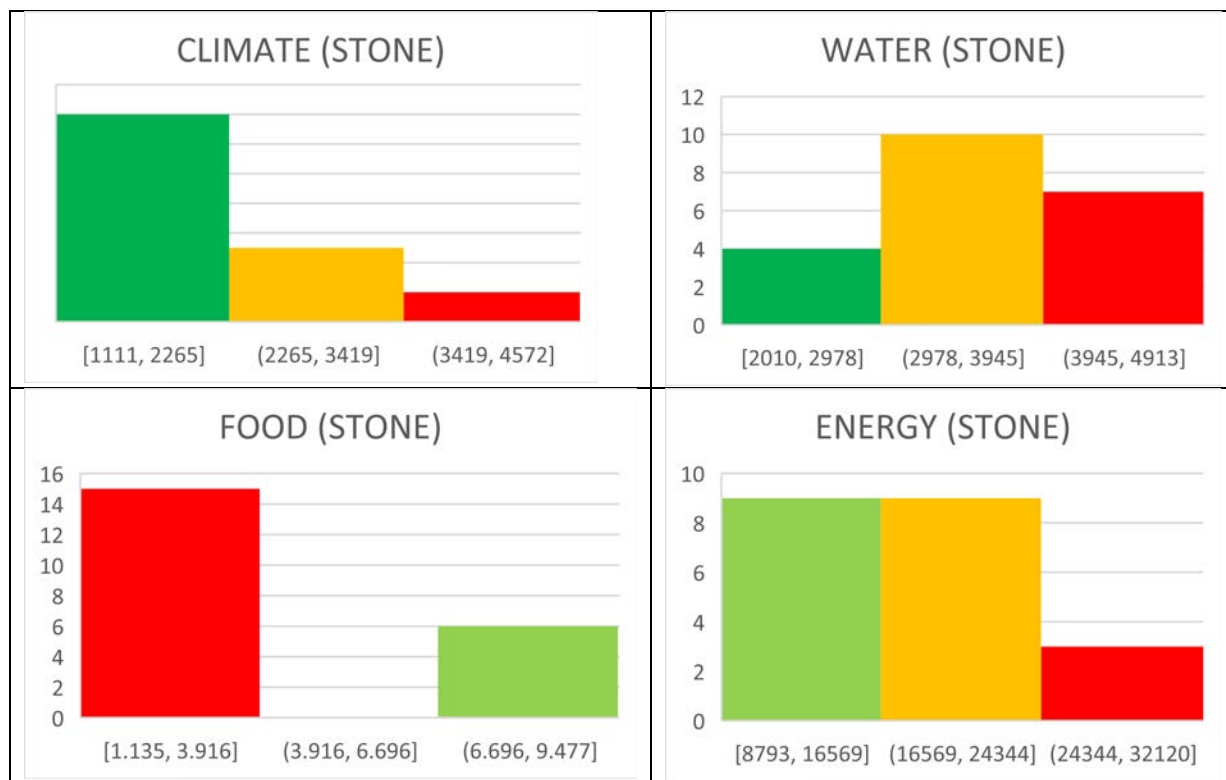

**Figure S3.** Classes obtained based on the values of the WEFC parameters for the mixed stone fruit orchards. Green: 3 points; orange: 1 point; red: 0 points.

**Table S4.** WEFC parameters for the mixed orchards and ES-related classification.

| Location                  | Code       | Sys-<br>tem | GHG<br>(kgCO <sub>2</sub> eq/ha) | WATER<br>(m <sup>3</sup> /ha) | FOOD<br>(Mcal/ha) | ENERGY<br>(MJ/ha) |
|---------------------------|------------|-------------|----------------------------------|-------------------------------|-------------------|-------------------|
| A. Varvara                | ALB1       | B           | 928                              | 658                           | 3.65              | 3708              |
| Lythrodontas              | PISC3      | C           | 4059                             | 2685                          | 19.33             | 16474             |
| Vavla                     | NUB10      | B           | 3164                             | 1418                          | 22.10             | 12726             |
| Limnatis                  | ALB14      | B           | 928                              | 658                           | 18.23             | 3708              |
| Limnatis                  | ALC15      | C           | 803                              | 113                           | 22.71             | 3472              |
| Limnatis                  | ALC16      | C           | 803                              | 113                           | 22.71             | 3472              |
| Vavla                     | ALC17      | C           | 803                              | 113                           | 22.71             | 3472              |
| A. Ioannis Maloun-<br>das | NUC23      | C           | 6699                             | 3923                          | 26.00             | 28022             |
| Dymes                     | ALC27      | C           | 803                              | 113                           | 22.71             | 3472              |
| Athiainou                 | ALB30      | B           | 592                              | 261                           | 6.08              | 2819              |
| Athiainou                 | ALC31      | C           | 803                              | 113                           | 22.71             | 3472              |
| Athiainou                 | ALB32      | B           | 928                              | 658                           | 18.23             | 3708              |
| Athiainou                 | ALC33      | C           | 803                              | 113                           | 22.71             | 3472              |
| Lythrodontas              | NUC35      | C           | 6699                             | 3923                          | 26.00             | 28022             |
| Trouloi                   | NUB38      | B           | 4701                             | 1839                          | 43.51             | 19395             |
| Machairas                 | NUC41      | C           | 6699                             | 3923                          | 26.00             | 28022             |
| Kapedes                   | NUC43      | C           | 6699                             | 3923                          | 26.00             | 28022             |
| Amargeti                  | NUC49      | C           | 6699                             | 3923                          | 26.00             | 28022             |
| Lythrodontas              | PLB2       | B           | 1918                             | 3015                          | 2.724             | 17461             |
| Korakou                   | PLB4       | B           | 1302                             | 2010                          | 1.135             | 12395             |
| Korakou                   | APRC5      | C           | 2139                             | 3500                          | 9.477             | 14163             |
| Temvria                   | PLB6       | B           | 1918                             | 3015                          | 2.724             | 17461             |
| Galata- Temvria           | PLC7       | C           | 2106                             | 4178                          | 8.626             | 13156             |
| Louvaras                  | CHB11      | B           | 4572                             | 4268                          | 3.170             | 32120             |
| Limnatis                  | PLB13      | B           | 1488                             | 2010                          | 1.362             | 13934             |
| Peristerona               | PLB18      | B           | 1918                             | 3015                          | 2.724             | 17461             |
| Peristerona               | PLC19      | C           | 2106                             | 4178                          | 8.626             | 13156             |
| Koutrafas                 | PLB20      | B           | 1918                             | 3015                          | 2.724             | 17461             |
| Koutrafas                 | APRC2<br>1 | C           | 2139                             | 3500                          | 9.477             | 14163             |
| A. Ioannis Maloun-<br>das | APRB2<br>2 | B           | 1566                             | 4913                          | 2.452             | 10047             |
| Dymes                     | PLB26      | B           | 1918                             | 3015                          | 2.724             | 17461             |
| M. Machaira               | PEB34      | B           | 2687                             | 3135                          | 1.428             | 25348             |
| Mosfiloti                 | PEC37      | C           | 3282                             | 4200                          | 7.880             | 22763             |
| M. Machaira               | PEB40      | B           | 2302                             | 2090                          | 1.428             | 21884             |
| Kapedes                   | CHB42      | B           | 3650                             | 4268                          | 2.219             | 28008             |
| Kampia                    | PEC44      | C           | 3282                             | 4200                          | 7.880             | 22763             |
| Mesa Chorio               | PEB46      | B           | 2508                             | 3135                          | 1.773             | 23743             |
| Amargeti                  | PLB48      | B           | 1706                             | 3015                          | 1.589             | 15924             |
| Panagia                   | PLC53      | C           | 1111                             | 2785                          | 2.875             | 8793              |
